# Supplementary material for: Hyperammonemia After Lung Transplantation: Systematic Review and a Mini Case Series
Source: PubMed Central journal article supplement (PMC9128545; doi:10.3389/ti.2022.10433), 2022-05-03

## Supplemental 3 Cases and Analyses Review

### Case 1

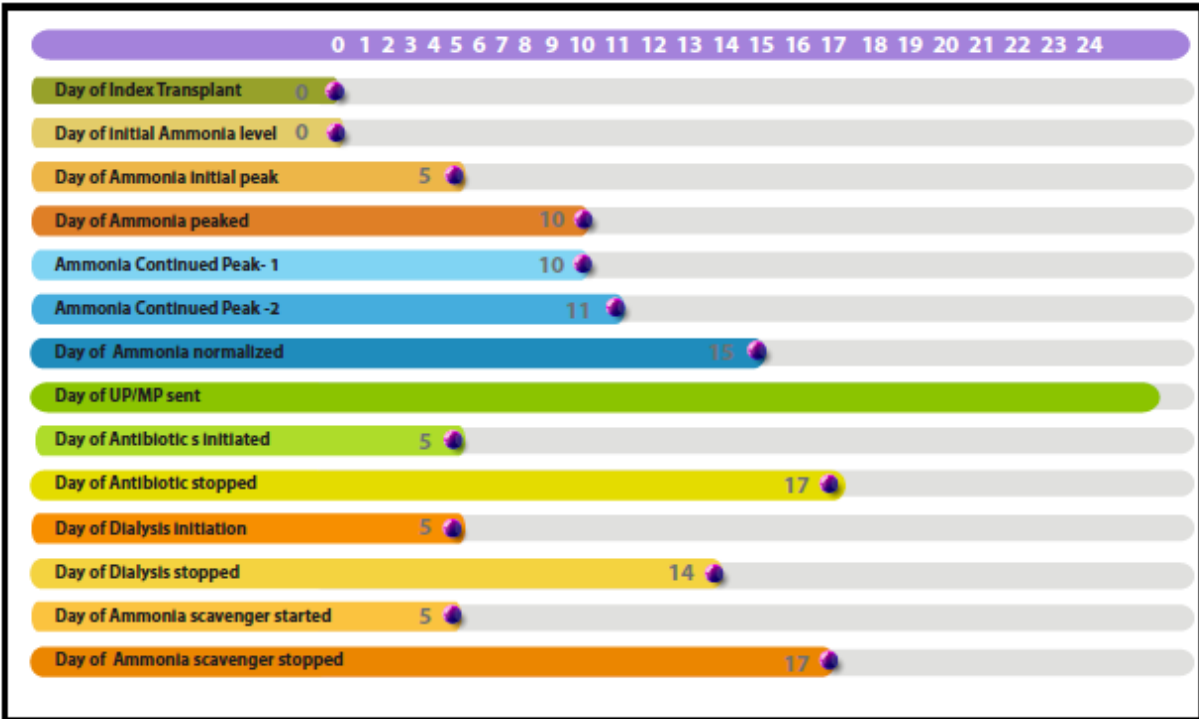

### Case 2

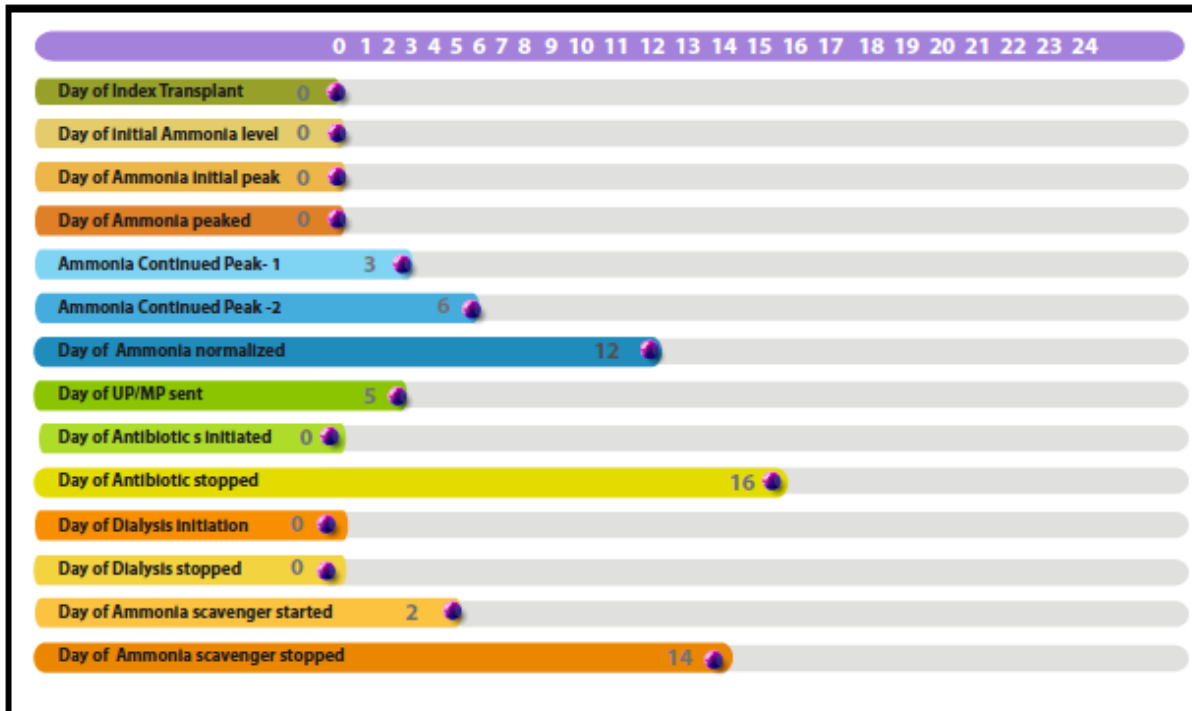

### Case 3

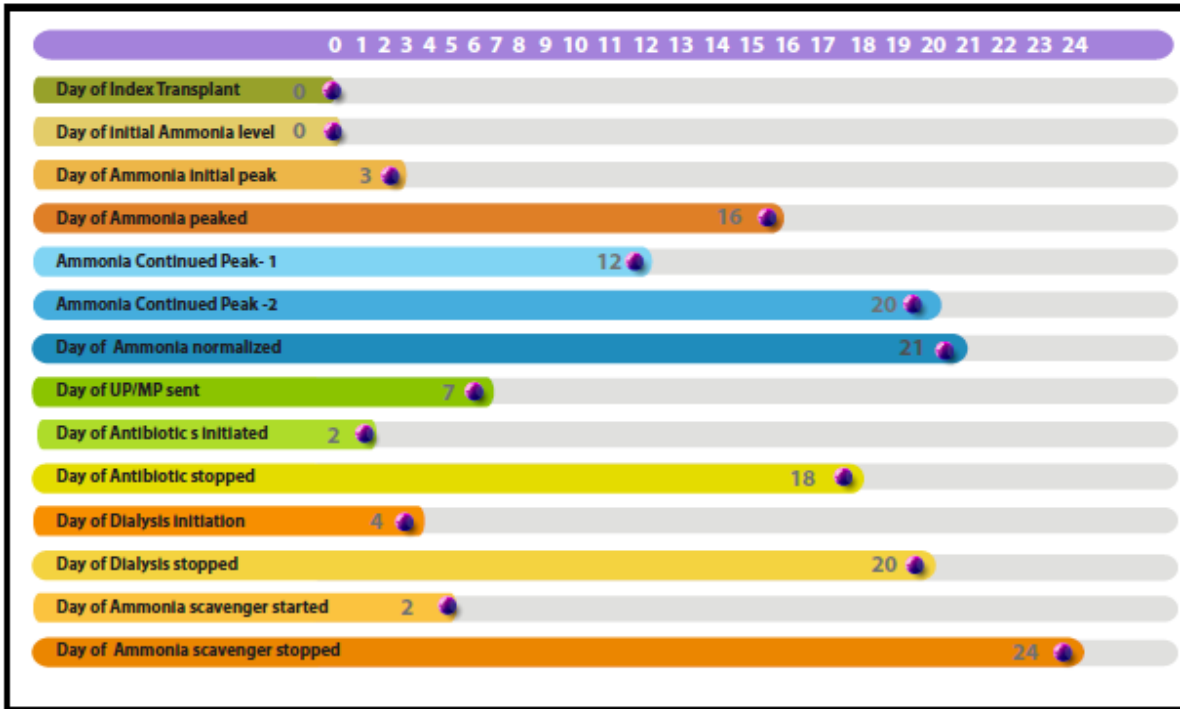

### Case 4

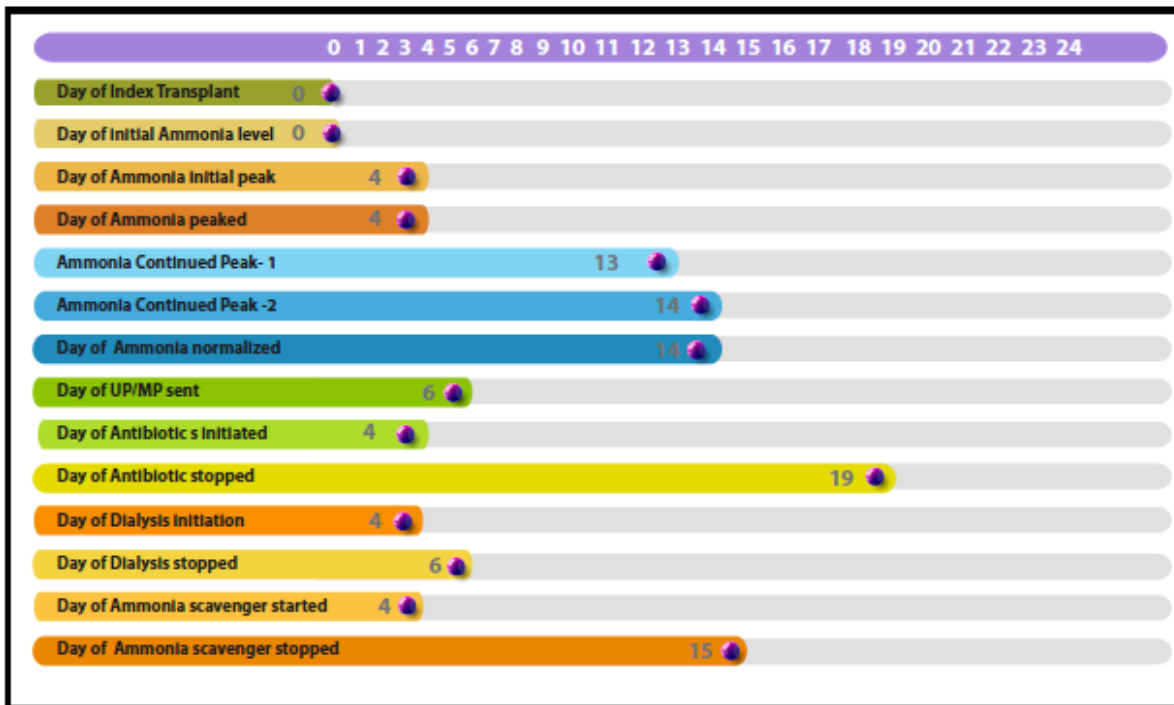

Supplement: DataSheet3.pdf [file DataSheet3.pdf]
